# Supplementary material for: Detecting schizophrenia with 3D structural brain MRI using deep learning
Source: PubMed Central journal article supplement (PMC10475022; doi:10.1038/s41598-023-41359-z), 2023-09-02
Supplement: 41598_2023_41359_MOESM1_ESM.pdf [file 41598_2023_41359_MOESM1_ESM.pdf]

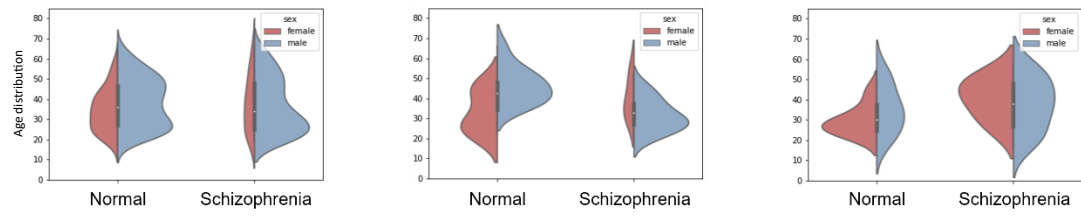

Supplementary Figure 1. The age and gender distribution in the train/validation/test dataset
